# Supplementary material for: Chemopreventive Effect of the Germinated Oat and Its Phenolic-AVA Extract in Azoxymethane/Dextran Sulfate Sodium (AOM/DSS) Model of Colon Carcinogenesis in Mice
Source: PubMed Central journal article supplement (PMC7074527; doi:10.3390/foods9020169), 2020-02-10
Supplement: foods-09-00169-s001.pdf [file foods-09-00169-s001.pdf]

**Table S1.** Flavonoid and non-flavonoid profile of oat seed and SO obtained by the UPLC-QTOF analysis

| Family         | Component name                             | Retention time (min) | Molecular formula                               | Expected mass | Observed mass | Mass error | Oat seed         | SO (25 °C/60 % HR) |
|----------------|--------------------------------------------|----------------------|-------------------------------------------------|---------------|---------------|------------|------------------|--------------------|
| Avenanthramide | Avenanthramide D                           | 6.19                 | C <sub>16</sub> H <sub>13</sub> NO <sub>4</sub> | 283.0845      | 283.0867      | 7.79       | LDL              | 6650.61 ± 2430.12  |
|                | Avenanthramide C                           | 6.62                 | C <sub>16</sub> H <sub>13</sub> NO <sub>6</sub> | 315.0743      | 315.0749      | 2.02       | 302.29 ± 0.00    | 568.10 ± 85.83     |
|                | Avenanthramide G/1c/2p isomer I            | 7.33                 | C <sub>16</sub> H <sub>13</sub> NO <sub>5</sub> | 299.0794      | 299.0789      | -1.74      | 2525.84 ± 0.00   | 2754.87 ± 830.21   |
|                | Avenanthramide G/1c/2p isomer II           | 7.34                 | C <sub>16</sub> H <sub>13</sub> NO <sub>5</sub> | 299.0794      | 299.0789      | -1.55      | 2913.04 ± 527.84 | LDL                |
|                | Avenanthramide G/1c/2p isomer III          | 7.36                 | C <sub>16</sub> H <sub>13</sub> NO <sub>5</sub> | 299.0794      | 299.0786      | -2.44      | 870.96 ± 281.37  | 217.96 ± 116.27    |
|                | Avenanthramide B                           | 7.66                 | C <sub>17</sub> H <sub>15</sub> NO <sub>6</sub> | 329.0899      | 329.0899      | -0.24      | 1297.30 ± 294.39 | 2606.07 ± 965.88   |
|                | Avenanthramide 2                           | 8.09                 | C <sub>18</sub> H <sub>17</sub> NO <sub>7</sub> | 359.1005      | 359.1003      | -0.57      | 230.58 ± 33.11   | 665.69 ± 462.71    |
|                | Avenanthramide L                           | 8.49                 | C <sub>18</sub> H <sub>15</sub> NO <sub>5</sub> | 325.0950      | 325.0957      | 1.99       | 639.73 ± 142.23  | 4325.82 ± 945.61   |
|                | Avenanthramide E                           | 9.85                 | C <sub>17</sub> H <sub>15</sub> NO <sub>5</sub> | 313.0950      | 313.0933      | -5.45      | 54.32 ± 0.00     | 325.56 ± 42.88     |
| Saponins       | Avenacoside A                              | 10.48                | C <sub>51</sub> H <sub>82</sub> O <sub>23</sub> | 1062.5247     | 1062.5230     | -1.62      | 575.17 ± 60.73   | 3632.47 ± 1525.98  |
| Flavanols      | (Epi)-galocatechin isomer I                | 1.36                 | C <sub>15</sub> H <sub>14</sub> O <sub>7</sub>  | 306.0740      | 306.0730      | -3.08      | 121.43 ± 0.00    | 284.77 ± 0.00      |
|                | (Epi)-galocatechin gallate                 | 1.38                 | C <sub>22</sub> H <sub>18</sub> O <sub>11</sub> | 458.0849      | 458.0875      | 5.68       | LDL              | LDL                |
|                | (Epi)-galocatechin isomer II               | 4.61                 | C <sub>15</sub> H <sub>14</sub> O <sub>7</sub>  | 306.0740      | 306.0712      | -9.02      | 330.39 ± 8.79    | 540.39 ± 0.00      |
|                | (Epi)-catechin-(Epi)-catechin gallactoside | 4.98                 | C <sub>36</sub> H <sub>34</sub> O <sub>15</sub> | 706.1898      | 706.1960      | 8.87       | LDL              | LDL                |
|                | (Epi)-catechin isomer I                    | 5.04                 | C <sub>15</sub> H <sub>14</sub> O <sub>6</sub>  | 290.0790      | 290.0763      | -9.60      | 506.58 ± 23.86   | 547.84 ± 88.16     |
|                | (Epi)-Catechin isomer II                   | 5.71                 | C <sub>15</sub> H <sub>14</sub> O <sub>6</sub>  | 290.0790      | 290.0776      | -4.92      | LDL              | 972.85 ± 0.00      |
|                | (Epi)-catechin hexose isomer I             | 5.89                 | C <sub>21</sub> H <sub>24</sub> O <sub>11</sub> | 452.1319      | 452.1349      | 6.70       | LDL              | LDL                |
|                | (Epi)-catechin hexose isomer II            | 6.87                 | C <sub>21</sub> H <sub>24</sub> O <sub>11</sub> | 452.1319      | 452.1350      | 6.99       | 618.12 ± 0.00    | 716.86 ± 138.73    |

|                     |                                       |           |           |          |          |       |                  |                    |
|---------------------|---------------------------------------|-----------|-----------|----------|----------|-------|------------------|--------------------|
| <b>Flavones</b>     | Luteolin rutinoside                   | 5.38      | C27H30O15 | 594.1585 | 594.1578 | -1.13 | 785.00 ± 52.45   | 552.27 ± 195.27    |
|                     | Apigenin apiosyl-hexoside             | 5.48      | C26H28O14 | 564.1479 | 564.1461 | -3.28 | 3702.91 ± 418.31 | 16616.23 ± 8385.16 |
|                     | Hydroxyluteolin rhamnoside            | 5.54      | C21H20O11 | 448.1006 | 448.0966 | -8.96 | 863.53 ± 49.73   | 772.40 ± 272.13    |
|                     | Luteolin apiosyl-malonyl-hexoside     | 5.66      | C29H30O18 | 666.1432 | 666.1464 | 4.75  | LDL              | 4092.88 ± 927.86   |
|                     | Luteolin glucuronide                  | 5.94      | C21H18O12 | 462.0798 | 462.0785 | -2.90 | 392.32 ± 0.00    | 774.23 ± 0.00      |
|                     | Apigenin glucuronide                  | 6.35      | C21H18O11 | 446.0849 | 446.0859 | 2.17  | 534.82 ± 0.00    | LDL                |
|                     | Luteolin 7-O-hexoside                 | 6.37      | C21H20O11 | 448.1006 | 448.0997 | -1.96 | 230.61 ± 33.84   | LDL                |
|                     | Luteolin malonyl-hexoside             | 6.73      | C24H22O14 | 534.1010 | 534.1025 | 2.81  | 654.31 ± 99.04   | 624.61 ± 71.96     |
|                     | Luteolin diglucuronide                | 6.83      | C27H26O18 | 638.1119 | 638.1150 | 4.87  | 1669.21 ± 156.93 | 1619.69 ± 39.64    |
|                     | Luteolin                              | 7.80      | C15H10O6  | 286.0477 | 286.0456 | -7.53 | LDL              | LDL                |
|                     | Hydroxyluteolin                       | 7.86      | C15H10O7  | 302.0427 | 302.0398 | -9.51 | 220.73 ± 37.48   | LDL                |
|                     | Apigenin hexoside                     | 8.30      | C21H20O10 | 432.1056 | 432.1041 | -3.49 | 3852.83 ± 0.00   | 2929.47 ± 0.00     |
|                     | Apigenin diglucuronide                | 8.39      | C27H26O17 | 622.1170 | 622.1161 | -1.46 | 1111.17 ± 101.81 | 1064.14 ± 44.60    |
|                     | Luteolin apiosyl-hexoside             | 8.41      | C26H28O15 | 580.1428 | 580.1392 | -6.21 | 330.27 ± 1.27    | 294.16 ± 128.18    |
|                     | Apigenin                              | 8.66      | C15H10O5  | 270.0528 | 270.0523 | -2.10 | LDL              | LDL                |
| Apigenin dihexoside | 9.17                                  | C27H30O15 | 594.1585  | 594.1578 | -1.06    | LDL   | LDL              |                    |
| <b>Flavonols</b>    | Quercetin dihexoside                  | 3.15      | C27H30O17 | 478.0747 | 478.0786 | 8.02  | 152.41 ± 0.00    | LDL                |
|                     | Kaempferol acetyl-hexoside            | 3.53      | C23H22O12 | 490.1111 | 490.1144 | 6.72  | LDL              | LDL                |
|                     | Myricetin rutinoside                  | 5.13      | C27H30O17 | 626.1483 | 626.1498 | 2.41  | 334.47 ± 0.00    | 284.58 ± 0.00      |
|                     | Quercetin rhamnoside                  | 5.19      | C21H20O11 | 448.1006 | 448.0997 | -1.93 | 299.22 ± 86.16   | LDL                |
|                     | Quercetin hexoside-pentoside-hexoside | 5.48      | C33H40O21 | 772.2062 | 772.2015 | -6.10 | 276.29 ± 34.94   | 360.51 ± 0.00      |
|                     | Kaempferol dihexoside                 | 5.67      | C27H30O16 | 610.1534 | 610.1517 | -2.80 | 867.11 ± 90.92   | 665.26 ± 37.09     |

|                                          |       |           |          |          |       |                    |                    |
|------------------------------------------|-------|-----------|----------|----------|-------|--------------------|--------------------|
| Quercetin pentoside-hexoside             | 5.67  | C27H30O16 | 610.1534 | 610.1545 | 1.88  | LDL                | 811.64 ± 0.00      |
| Quercetin malonyl-hexoside               | 5.89  | C24H22O15 | 550.0959 | 550.0973 | 2.69  | LDL                | 1034.64 ± 0.00     |
| Kaempferol hexoside                      | 5.94  | C21H20O11 | 448.1006 | 448.1000 | -1.27 | LDL                | 413.79 ± 0.00      |
| Quercetin xyloside                       | 6.06  | C20H18O11 | 434.0849 | 434.0811 | -8.85 | 153.62 ± 2.70      | LDL                |
| Kaempferol trihexoside                   | 6.33  | C33H40O21 | 772.2062 | 772.2037 | -3.24 | 442.85 ± 61.87     | LDL                |
| Kaempferol pentoside-hexoside-rhamnoside | 6.33  | C34H40O21 | 740.2164 | 740.2148 | -2.07 | 29395.08 ± 2058.54 | 13676.68 ± 2637.90 |
| Kaempferol acetyl-hexoside-rhamnoside    | 6.73  | C29H32O16 | 636.1690 | 636.1639 | -8.13 | LDL                | LDL                |
| Kaempferol malonyl-hexoside              | 6.73  | C24H22O14 | 534.1010 | 534.1025 | 2.81  | 654.31 ± 99.04     | 624.61 ± 71.96     |
| Quercetin                                | 7.86  | C15H10O7  | 302.0427 | 302.0398 | -9.51 | 220.73 ± 37.48     | LDL                |
| Kaempferol                               | 8.85  | C15H10O6  | 286.0477 | 286.0469 | -3.03 | 106.31 ± 0.00      | LDL                |
| Kaempferide                              | 8.97  | C16H11O6  | 299.0556 | 299.0578 | 7.39  | 378.07 ± 0.00      | LDL                |
| Isorhamnetin                             | 9.05  | C16H12O7  | 316.0583 | 316.0575 | -2.65 | 290.39 ± 231.85    | 244.22 ± 0.00      |
| Kaempferol hexoside-rhamnoside           | 9.17  | C27H30O15 | 594.1585 | 594.1578 | -1.06 | LDL                | LDL                |
| Quercetin acetyl-hexoside-rhamnoside     | 10.08 | C29H32O17 | 652.1639 | 652.1594 | -6.98 | 185.22 ± 36.11     | LDL                |
| Quercetin hexoside                       | 11.01 | C21H20O12 | 464.0955 | 464.0956 | 0.22  | 284.48 ± 81.40     | 274.62 ± 51.67     |
| Quercetin pentoside-rutinoside           | 11.78 | C32H38O20 | 742.1956 | 742.2008 | 6.94  | 301.84 ± 0.00      | 267.72 ± 45.69     |
| Quercetin hexoside-xyloside              | 12.31 | C26H28O16 | 478.0747 | 478.0754 | 1.31  | LDL                | 282.82 ± 0.00      |
| Kaempferol hexoside-rhamnoside-hexoside  | 12.81 | C33H40O20 | 756.2113 | 756.2123 | 1.33  | LDL                | LDL                |
| Myricetin rhamnoside                     | 13.28 | C21H20O12 | 464.0955 | 464.0997 | 9.14  | 1235.04 ± 0.00     | LDL                |
| Kaempferol pentoside-hexoside            | 13.41 | C26H28O15 | 580.1428 | 580.1392 | -6.21 | 330.27 ± 1.27      | 294.16 ± 128.18    |

|                      |                                  |       |           |          |          |       |                 |                 |
|----------------------|----------------------------------|-------|-----------|----------|----------|-------|-----------------|-----------------|
|                      | Quercetin hexoside-rhamnoside    | 13.83 | C27H30O16 | 610.1534 | 610.1560 | 4.30  | LDL             | LDL             |
| Hydroxybenzoic acids | Gallic acid                      | 1.03  | C7H6O5    | 170.0215 | 170.0216 | 0.61  | 623.53 ± 162.41 | 871.40 ± 486.29 |
|                      | Hydroxybenzoic acid isomer I     | 1.15  | C7H6O3    | 138.0317 | 138.0320 | 1.98  | 55.46 ± 9.22    | 215.08 ± 58.27  |
|                      | Hydroxybenzoic acid hexoside     | 1.15  | C13H16O8  | 300.0845 | 300.0838 | -2.38 | 133.91 ± 29.34  | 529.40 ± 79.81  |
|                      | Dihydroxybenzoic acid isomer I   | 1.15  | C7H6O4    | 154.0266 | 154.0259 | -4.43 | LDL             | 104.37 ± 53.88  |
|                      | Gallic acid hexoside isomer I    | 1.26  | C13H16O10 | 332.0743 | 332.0714 | -8.82 | 362.72 ± 15.08  | 564.17 ± 159.17 |
|                      | Gallic acid gallate              | 1.39  | C14H10O9  | 322.0325 | 322.0344 | 5.90  | 688.21 ± 0.00   | LDL             |
|                      | Dihydroxybenzoic acid hexoside   | 1.54  | C13H16O9  | 316.0794 | 316.0801 | 1.96  | 867.19 ± 113.97 | 608.53 ± 194.85 |
|                      | Gallic acid hexoside isomer IO   | 1.82  | C13H16O10 | 332.0743 | 332.0734 | -2.71 | 299.85 ± 0.00   | 600.95 ± 0.00   |
|                      | Dihydroxybenzoic acid isomer II  | 1.87  | C7H6O4    | 154.0266 | 154.0263 | -2.05 | 69.48 ± 26.40   | 254.13 ± 98.52  |
|                      | Hydroxybenzoic acid isomer II    | 3.17  | C7H6O3    | 138.0317 | 138.0315 | -1.33 | 62.48 ± 0.00    | 888.54 ± 329.17 |
|                      | Syringic acid                    | 3.21  | C9H10O5   | 198.0528 | 198.0512 | -8.02 | 600.06 ± 0.00   | LDL             |
|                      | Vanillic acid                    | 4.05  | C8H8O4    | 168.0423 | 168.0416 | -4.14 | 75.97 ± 10.76   | 77.88 ± 7.75    |
|                      | Benzoic acid                     | 4.20  | C7H6O2    | 122.0368 | 122.0370 | 1.55  | 341.22 ± 134.56 | 976.89 ± 272.52 |
|                      | Gallic acid ethyl ester          | 4.41  | C9H10O5   | 198.0528 | 198.0512 | -8.44 | 209.89 ± 108.98 | 81.62 ± 0.00    |
|                      | Dihydroxybenzoic acid isomer III | 4.79  | C7H6O4    | 154.0266 | 154.0265 | -0.58 | 342.89 ± 45.68  | 260.96 ± 62.98  |
|                      | Ellagic acid                     | 5.60  | C14H6O8   | 302.0063 | 302.0058 | -1.65 | 2153.40 ± 15.87 | 2274.62 ± 47.25 |
|                      | Ellagic acid acetyl-pentoside    | 6.43  | C21H16O13 | 476.0591 | 476.0573 | -3.77 | 2105.59 ± 0.00  | LDL             |
|                      | Hydroxybenzoic acid isomer III   | 6.64  | C7H6O3    | 138.0317 | 138.0320 | 1.98  | 187.04 ± 13.91  | 177.20 ± 60.97  |
|                      | Dihydroxybenzoic acid isomer IV  | 9.69  | C7H6O4    | 154.0266 | 154.0255 | -7.18 | 48.45 ± 0.00    | LDL             |

|                              |                                |          |           |          |          |                |                 |                  |
|------------------------------|--------------------------------|----------|-----------|----------|----------|----------------|-----------------|------------------|
|                              | Ellagic acid pentoside         | 10.97    | C19H14O12 | 434.0485 | 434.0490 | 1.08           | 269.30 ± 24.82  | 217.74 ± 16.77   |
| <b>Hydroxycinnamic acids</b> | Caffeic acid hexoside          | 1.44     | C15H18O9  | 342.0951 | 342.0919 | -9.34          | LDL             | LDL              |
|                              | Caffeoylquinic acid isomer I   | 2.39     | C16H18O9  | 354.0951 | 354.0935 | -4.51          | LDL             | LDL              |
|                              | Coumaric acid isomer I         | 2.60     | C9H8O3    | 164.0473 | 164.0476 | 1.64           | LDL             | 118.80 ± 29.98   |
|                              | Hydroxycaffeic acid            | 2.78     | C9H8O5    | 196.0372 | 196.0375 | 1.57           | LDL             | 155.64 ± 44.44   |
|                              | Ferulic acid hexoside          | 3.55     | C16H20O9  | 356.1107 | 356.1104 | -0.80          | 674.53 ± 430.52 | 695.04 ± 83.15   |
|                              | Coumaroylquinic acid isomer I  | 3.57     | C16H18O8  | 338.1002 | 338.1000 | -0.47          | 137.68 ± 22.87  | LDL              |
|                              | Coumaric acid isomer II        | 3.76     | C9H8O3    | 164.0473 | 164.0474 | 0.43           | 223.61 ± 34.03  | 1488.99 ± 189.46 |
|                              | Caffeoylquinic acid isomer II  | 3.81     | C16H18O9  | 354.0951 | 354.0923 | -7.96          | 90.82 ± 0.00    | 460.82 ± 0.00    |
|                              | Coumaric acid hexoside         | 3.99     | C15H18O8  | 326.1002 | 326.1002 | -0.05          | LDL             | 170.45 ± 15.35   |
|                              | Sinapic acid                   | 4.01     | C11H12O5  | 224.0685 | 224.0676 | -3.74          | 492.24 ± 50.56  | 222.28 ± 37.37   |
|                              | Caffeoylquinic acid isomer III | 4.05     | C16H18O9  | 354.0951 | 354.0949 | -0.58          | LDL             | 209.80 ± 32.25   |
|                              | Feruloylquinic acid isomer I   | 4.10     | C17H20O9  | 368.1107 | 368.1110 | 0.84           | 613.78 ± 49.21  | 664.13 ± 204.62  |
|                              | Caffeic acid                   | 4.16     | C9H8O4    | 180.0423 | 180.0416 | -3.90          | 224.97 ± 40.32  | 174.22 ± 20.75   |
|                              | Diferuloylquinic acid isomer I | 4.58     | C27H28O12 | 544.1581 | 544.1533 | -8.70          | LDL             | LDL              |
|                              | Coumaroylquinic acid isomer I  | 4.72     | C16H18O8  | 338.1002 | 338.1035 | 9.85           | LDL             | LDL              |
|                              | Feruloylquinic acid isomer II  | 5.09     | C17H20O9  | 368.1107 | 368.1109 | 0.45           | 123.10 ± 0.28   | 137.74 ± 41.62   |
|                              | Coumaric acid isomer III       | 5.13     | C9H8O3    | 164.0473 | 164.0475 | 1.16           | 130.98 ± 25.00  | 240.34 ± 44.09   |
|                              | Cinnamic acid                  | 5.37     | C9H8O2    | 148.0524 | 148.0524 | -0.37          | 789.42 ± 0.00   | 230.01 ± 84.91   |
|                              | Dicaffeoylquinic acid isomer I | 5.45     | C25H24O12 | 516.1268 | 516.1255 | -2.42          | LDL             | LDL              |
|                              | Ferulic acid                   | 5.65     | C10H10O4  | 194.0579 | 194.0579 | 0.15           | 197.53 ± 45.06  | 680.43 ± 113.28  |
| Isoferulic acid              | 6.01                           | C10H10O4 | 194.0579  | 194.0582 | 1.53     | 145.59 ± 16.52 | 261.48 ± 51.54  |                  |

|                    |                                  |       |           |          |          |       |                |                 |
|--------------------|----------------------------------|-------|-----------|----------|----------|-------|----------------|-----------------|
|                    | Diferuloylquinic acid isomer II  | 6.28  | C27H28O12 | 544.1581 | 544.1527 | -9.82 | LDL            | 350.60 ± 120.04 |
|                    | Feruoylquinic acid isomer III    | 6.62  | C17H20O9  | 368.1107 | 368.1119 | 3.24  | LDL            | LDL             |
|                    | Caffeoyl tartaric acid           | 6.75  | C13H12O9  | 312.0481 | 312.0483 | 0.41  | LDL            | LDL             |
|                    | Coumaroylquinic acid isomer I    | 6.87  | C16H18O8  | 338.1002 | 338.1006 | 1.32  | 472.77 ± 0.00  | LDL             |
|                    | Coumaroylquinic acid isomer I    | 7.71  | C16H18O8  | 338.1002 | 338.1024 | 6.54  | 159.32 ± 1.69  | 182.38 ± 14.28  |
|                    | Coumaroylquinic acid tyrosine    | 8.01  | C18H17NO5 | 327.1107 | 327.1102 | -1.50 | LDL            | LDL             |
|                    | Caffeic acid ethyl ester         | 8.22  | C11H12O4  | 208.0736 | 208.0726 | -4.58 | 425.88 ± 0.00  | 133.43 ± 34.18  |
|                    | Cinnamic acid glucose            | 9.58  | C15H18O7  | 310.1053 | 310.1073 | 6.74  | 277.99 ± 0.00  | 233.65 ± 26.84  |
|                    | Coumaroulquinic acid malic acid  | 9.70  | C13H12O7  | 280.0583 | 280.0588 | 1.87  | 115.99 ± 15.45 | 135.91 ± 57.42  |
|                    | Sinapoylquinic acid              | 10.33 | C18H22O10 | 398.1213 | 398.1220 | 1.65  | 832.12 ± 45.17 | 747.96 ± 65.85  |
| <b>Isoflavones</b> | Hydroxydihydrodaidzein isomer I  | 5.87  | C15H12O5  | 272.0685 | 272.0685 | -0.05 | LDL            | LDL             |
|                    | Malonyldaidzin                   | 6.77  | C24H22O12 | 502.1111 | 502.1125 | 2.79  | LDL            | 649.28 ± 308.32 |
|                    | Acetylgenistin                   | 6.84  | C23H22O11 | 474.1162 | 474.1203 | 8.73  | 2154.74 ± 0.00 | 1995.66 ± 0.00  |
|                    | Hydroxydihydrodaidzein isomer II | 6.90  | C15H12O5  | 272.0685 | 272.0683 | -0.80 | LDL            | 180.21 ± 35.27  |
|                    | Daidzin                          | 7.72  | C21H20O9  | 416.1107 | 416.1075 | -7.81 | 110.16 ± 0.00  | LDL             |
|                    | Malonylgenistin                  | 8.35  | C24H22O13 | 518.1060 | 518.1054 | -1.24 | 654.87 ± 0.00  | 547.37 ± 0.00   |
|                    | Hydroxygenistein                 | 8.85  | C15H10O6  | 286.0477 | 286.0469 | -3.03 | 106.31 ± 0.00  | LDL             |
|                    | Acetyldaidzin                    | 9.12  | C23H22O10 | 458.1213 | 458.1251 | 8.39  | 1328.33 ± 0.00 | 1056.59 ± 69.29 |
| <b>Lignans</b>     | Lariciresinol-sesquilignan       | 6.33  | C30H36O10 | 556.2308 | 556.2359 | 9.05  | 231.66 ± 0.00  | LDL             |
|                    | Dimethylmatairesinol             | 6.52  | C22H26O6  | 386.1729 | 386.1762 | 8.46  | LDL            | 548.09 ± 0.00   |
|                    | Medioresinol                     | 6.61  | C21H24O7  | 388.1522 | 388.1557 | 9.09  | LDL            | LDL             |
|                    | Isohydroxymatairesinol           | 7.53  | C20H22O7  | 374.1366 | 374.1372 | 1.67  | 458.04 ± 83.77 | 317.39 ± 54.23  |

|                     |                                    |       |           |          |          |       |                 |                 |
|---------------------|------------------------------------|-------|-----------|----------|----------|-------|-----------------|-----------------|
|                     | Hydroxymatairesinol                | 7.54  | C20H22O7  | 374.1366 | 374.1343 | -6.00 | LDL             | LDL             |
|                     | Acetoxypinoresinol                 | 7.75  | C22H24O8  | 416.1471 | 416.1499 | 6.81  | LDL             | 2609.63 ± 0.00  |
|                     | Syringaresinol                     | 7.87  | C22H26O8  | 418.1628 | 418.1610 | -4.23 | LDL             | 725.32 ± 137.25 |
|                     | Secoisolariciresinol               | 8.64  | C20H26O6  | 362.1729 | 362.1701 | -7.78 | 1964.54 ± 66.57 | 2057.91 ± 55.54 |
|                     | Secoisolariciresinol-sesquillignan | 8.98  | C30H38O10 | 558.2465 | 558.2505 | 7.21  | 328.48 ± 0.00   | 245.48 ± 0.00   |
|                     | Pinoresinol                        | 9.20  | C20H22O6  | 358.1416 | 358.1395 | -6.02 | 378.22 ± 0.00   | 445.74 ± 0.00   |
|                     | Isolariciresinol                   | 9.53  | C20H24O6  | 360.1573 | 360.1538 | -9.68 | LDL             | LDL             |
|                     | Lariciresinol                      | 9.94  | C20H24O6  | 360.1573 | 360.1543 | -8.28 | 1156.93 ± 0.00  | LDL             |
|                     | Matairesinol                       | 10.37 | C20H22O6  | 358.1416 | 358.1428 | 3.13  | 469.68 ± 90.36  | 517.80 ± 40.05  |
| <b>Phytosterols</b> | Beta-campesterol                   | 15.25 | C28H48O   | 400.3705 | 400.3667 | -9.64 | LDL             | 167.63 ± 5.32   |
|                     | Beta-campesterol hexoside          | 22.53 | C34H58O6  | 562.4233 | 562.4211 | -3.95 | 837.95 ± 63.03  | 957.45 ± 75.43  |
|                     | Stigmasterol hexoside              | 22.58 | C35H58O6  | 574.4233 | 574.4228 | -0.99 | LDL             | LDL             |
|                     | Brassicasterol hexoside            | 23.86 | C34H56O6  | 560.4077 | 560.4061 | -2.80 | 1479.97 ± 0.00  | 591.03 ± 39.50  |
|                     | Beta-sitosterol hexoside           | 25.04 | C35H60O6  | 576.4390 | 576.4349 | -7.11 | 832.00 ± 116.45 | 962.93 ± 117.69 |

Values (n = 3) are expressed as means ± standard deviation.

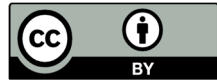

© 2020 by the authors. Licensee MDPI, Basel, Switzerland. This article is an open access article distributed under the terms and conditions of the Creative Commons Attribution (CC BY) license (<http://creativecommons.org/licenses/by/4.0/>).
